# Supplementary material for: Considering the Size Distribution of Elements in Particle Matter and Oxidation Potential: Association before and after Respiratory Exposure
Source: MDPI journal article supplement (doi:10.3390/atmos15040411), 2024-03-26
Supplement: s1 [file s1]

# Considering the Size Distribution of Elements in Particle Matter and Oxidation Potential: Association before and after Respiratory Exposure

Xing Li, Tingting Xu and Ying Guo

## Methods Introduction

### Sample Digestion Steps.

Step 1: The digestion vessel was placed in the fume hood for 40 minutes for predigestion. Step 2: Digestion vessel was exposed to a three-stage microwave system and was digested at 195 °C for 50 minutes. Step 3: The dissolved solutions were warmed at 180 °C to remove the excess acid because HF can corrode glassware and cause torch damage in ICP-MS. Step 4: After the vessels were cooled to room temperature, the residue was transferred to PET bottles with deionized water (conductivity: 18.2 MΩ cm) by repeatedly washing the digestion vessel.

### $OP_m^{DTT}$ and $OP_v^{DTT}$ Calculation Method.

$$\sigma DTT = -\sigma Abs \times \frac{N_0}{Abs_0} \quad (S1)$$

$$OP_m^{DTT} = \frac{\sigma DTT_s - \sigma DTT_b}{\frac{V_a \times M_p}{V_e}} \quad (S2)$$

$$OP_v^{DTT} = \frac{\sigma DTT_s - \sigma DTT_b}{\frac{V_a \times V_p}{V_e}} \quad (S3)$$

where  $\sigma Abs$  is the slope of absorbance (412 nm) versus time;  $Abs_0$  is the initial absorbance calculated from the intercept of linear regression of absorbance versus time;  $N_0$  is the initial moles of DTT added in the reaction (5ml);  $\sigma DTT_s$  ( $\sigma DTT_b$ ) is the rate of DTT consumption for the sample (blank); and  $V_e$  and  $V_a$  are the extraction volume (6.5mL) and actual sample volume added to the reaction vial (1mL), respectively.  $M_p$  and  $V_p$  are the mass of sampling PM and sampling air volume ( $m^3$ ) in the extraction volume.

### Enrichment Factor (EF) Calculation Method.

$$EF_x = \frac{\left(\frac{X}{Al}\right)_{sample}}{\left(\frac{X}{Al}\right)_{crust}} \quad (S4)$$

where  $EF_x$  represents the enrichment factor value of element X in air PM;  $\left(\frac{X}{Al}\right)_{samples}$  represents the ratio of X/Al in the samples; and  $\left(\frac{X}{Al}\right)_{crust}$  represents the ratio of X/Al in the local continental crust elements. The reference concentrations of Al, K, Ca, V, Cr, Mn, Fe, Co, Ni, Cu, Zn, As, Se, Ag, Cd, Sn, Sb, Ba, Hg, Tl, and Pb in the crust of Guangdong province were 62.9 g kg<sup>-1</sup>, 7.40 g kg<sup>-1</sup>, 40 g kg<sup>-1</sup>, 39.0 mg kg<sup>-1</sup>, 35.6 mg kg<sup>-1</sup>, 163 mg kg<sup>-1</sup>, 20.6 g kg<sup>-1</sup>, 5.30 mg kg<sup>-1</sup>, 9.60 mg kg<sup>-1</sup>, 10.5 mg kg<sup>-1</sup>, 36.3 mg kg<sup>-1</sup>, 6.80 mg kg<sup>-1</sup>, 0.65 mg kg<sup>-1</sup>, 0.10 mg kg<sup>-1</sup>, 0.04 mg kg<sup>-1</sup>, 3.70 mg kg<sup>-1</sup>, 0.41 mg kg<sup>-1</sup>, 126 mg kg<sup>-1</sup>, 0.06 mg kg<sup>-1</sup>, 0.61 mg kg<sup>-1</sup>, and 29.8 mg kg<sup>-1</sup>, respectively. [1]

**Table S1.** Field blanks and limit of detection of the procedure for microwave digestion.

| Elements | Field blanks              | Limit of detection        |
|----------|---------------------------|---------------------------|
|          | Air (ng m <sup>-3</sup> ) | Air (ng m <sup>-3</sup> ) |
| Al       | 228                       | 0.07                      |
| K        | 128                       | 0.02                      |
| Ca       | 228                       | 0.02                      |
| V        | 0.15                      | 0.01                      |
| Cr       | 4.93                      | 0.02                      |
| Mn       | 0.70                      | 0.03                      |
| Fe       | 31.5                      | 0.03                      |
| Co       | 0.04                      | 0.01                      |
| Ni       | 0.61                      | 0.04                      |
| Cu       | 0.54                      | 0.04                      |
| Zn       | 7.13                      | 0.02                      |
| As       | 0.01                      | 0.01                      |
| Se       | 0.55                      | 0.02                      |
| Ag       | 0.00                      | 0.03                      |
| Cd       | 0.14                      | 0.02                      |
| Sn       | 3.10                      | 0.02                      |
| Sb       | 0.00                      | 0.01                      |
| Ba       | 2.68                      | 0.01                      |
| Hg       | 0.00                      | 0.02                      |
| Tl       | 0.00                      | 0.01                      |
| Pb       | 0.52                      | 0.03                      |

Field blanks in the solution were calculated to be equal to the mean values of element concentrations in 12 filter blanks. Limit of detection (LOD) corresponds to three times the standard deviation of the blank signals obtained by using the results of 6 replicate measurements of the solvent blank. Field blanks and LOD in air (ng m<sup>-3</sup>) = concentrations in solution (ng ml<sup>-1</sup>) × solution volume (ml) / air volume (m<sup>3</sup>)

**Table S2.** Definitions and recommended values of the parameters for health risk assessment of elements via inhalation pathway.

| Parameter | Definition         | Unit                    | Value                              | Reference  |
|-----------|--------------------|-------------------------|------------------------------------|------------|
| DF        | Deposition flux    | ng h <sup>-1</sup>      | -                                  | This study |
| ET        | Exposure time      | H day <sup>-1</sup>     | 12.5                               | This study |
| EF        | Exposure frequency | Days year <sup>-1</sup> | 335                                | This study |
| ED        | Exposure duration  | years                   | 30                                 | [2]        |
| CF        | Conversion factor  | kg mg <sup>-1</sup>     | 10 <sup>-6</sup>                   |            |
| AT        | Average time       | days                    | Non-carcinogens,<br>AT=ED×365 days | [3]        |
|           |                    |                         | Carcinogens, AT=70×365<br>days     | [4]        |
| BW        | Body weight        | kg                      | 70                                 | [5]        |

**Table S3.** Oral reference dose (RfD) (mg kg<sup>-1</sup> day<sup>-1</sup>) and cancer slope factor (CSF) (kg·day mg<sup>-1</sup>) of elements.

| Elements | RfD <sup>6</sup><br>(mg kg <sup>-1</sup> day <sup>-1</sup> ) | SF <sup>6</sup><br>(kg·day mg <sup>-1</sup> ) |
|----------|--------------------------------------------------------------|-----------------------------------------------|
| Cu       | 4.02×10 <sup>-2</sup>                                        |                                               |
| Zn       | 3.00×10 <sup>-1</sup>                                        |                                               |
| Pb       | 3.52×10 <sup>-3</sup>                                        | 2.80×10 <sup>-1</sup>                         |
| Fe       | 7.00×10 <sup>-1</sup>                                        |                                               |
| Mn       | 1.43×10 <sup>-5</sup>                                        |                                               |
| Cd       | 1.00×10 <sup>-3</sup>                                        | 6.30                                          |
| V        | 7.00×10 <sup>-3</sup>                                        |                                               |
| Cr       | 2.86×10 <sup>-5</sup>                                        | 4.20×10 <sup>1</sup>                          |
| Tl       | 1.00×10 <sup>-5</sup>                                        |                                               |
| As       | 3.01×10 <sup>-4</sup>                                        | 1.51×10 <sup>1</sup>                          |
| Co       | 5.71×10 <sup>-6</sup>                                        | 9.80                                          |

**Table S4.** Values (mean ± standard deviation) of element concentrations (ng m<sup>-3</sup>), and OP<sub>m</sub><sup>DTT</sup> (pmol min<sup>-1</sup> ug<sup>-1</sup>) and OP<sub>v</sub><sup>DTT</sup> (nmol min<sup>-1</sup>m<sup>-3</sup>) of PM with different sizes in the waste recycle plant, South China.

| Species                         | Unit                                       | Particle size range |           |           |           |           |           |           |           |            |
|---------------------------------|--------------------------------------------|---------------------|-----------|-----------|-----------|-----------|-----------|-----------|-----------|------------|
|                                 |                                            | 0–0.4               | 0.4–0.7   | 0.7–1.1   | 1.1–2.1   | 2.1–3.3   | 3.3–4.7   | 4.7–5.8   | 5.8–9.0   | 9.0–10     |
| Al                              | µg m <sup>-3</sup>                         | 0.82±0.60           | 0.77±0.56 | 0.68±0.27 | 0.87±0.52 | 0.97±0.54 | 1.14±1.13 | 1.10±0.49 | 2.53±2.43 | 3.25±2.20  |
| K                               | µg m <sup>-3</sup>                         | 0.18±0.17           | 0.24±0.11 | 0.33±0.15 | 0.31±0.15 | 0.30±0.15 | 0.33±0.09 | 0.31±0.09 | 0.62±0.71 | 0.89±0.70  |
| Ca                              | µg m <sup>-3</sup>                         | 0.41±0.28           | 0.48±0.20 | 0.41±0.20 | 0.52±0.22 | 0.50±0.24 | 0.68±0.26 | 0.61±0.27 | 1.52±1.26 | 2.02±1.24  |
| V                               | ng m <sup>-3</sup>                         | 0.30±0.47           | 0.19±0.12 | 0.28±0.11 | 0.40±0.15 | 0.51±0.18 | 0.73±0.18 | 0.74±0.18 | 1.39±0.39 | 3.08±1.17  |
| Cr                              | ng m <sup>-3</sup>                         | 24.1±15.0           | 13.5±11.6 | 11.3±10.0 | 9.11±10.8 | 14.7±14.0 | 12.9±12.2 | 22.3±19.6 | 16.6±13.1 | 24.1±10.3  |
| Mn                              | ng m <sup>-3</sup>                         | 4.28±3.05           | 7.72±3.31 | 14.2±6.00 | 12.5±5.17 | 8.26±2.71 | 10.9±2.42 | 11.5±1.87 | 24.5±7.04 | 62.7±21.5  |
| Fe                              | ng m <sup>-3</sup>                         | 191±180             | 141±47.0  | 186±57.9  | 298±90.0  | 442±154   | 713±168   | 831±146   | 1672±410  | 4713±1573  |
| Co                              | ng m <sup>-3</sup>                         | 0.07±0.07           | 0.34±0.24 | 0.19±0.15 | 0.24±0.23 | 0.42±0.40 | 0.31±0.23 | 0.30±0.20 | 0.51±0.19 | 1.17±0.47  |
| Ni                              | ng m <sup>-3</sup>                         | 2.86±2.70           | 1.33±1.15 | 0.81±0.49 | 1.22±0.61 | 2.01±1.82 | 1.57±0.84 | 1.86±1.45 | 3.02±3.01 | 6.02±4.32  |
| Cu                              | ng m <sup>-3</sup>                         | 10.0±9.05           | 3.54±2.65 | 4.14±2.63 | 5.68±4.11 | 4.45±2.77 | 5.64±3.24 | 5.61±3.36 | 11.7±6.57 | 37.3±27.4  |
| Zn                              | ng m <sup>-3</sup>                         | 85.6±52.9           | 79.0±39.9 | 86.3±50.8 | 82.2±49.5 | 79.3±49.9 | 77.6±40.0 | 92.1±38.3 | 102±32.9  | 147±24.8   |
| As                              | ng m <sup>-3</sup>                         | 19.9±14.1           | 19.8±10.2 | 19.0±11.3 | 29.1±23.4 | 24.5±24.2 | 26.9±17.4 | 23.3±16.8 | 31.7±14.7 | 33.0±20.3  |
| Se                              | ng m <sup>-3</sup>                         | 0.63±0.45           | 0.84±0.48 | 1.05±0.39 | 0.89±0.58 | 0.85±0.56 | 0.49±0.36 | 0.43±0.29 | 0.41±0.28 | 0.67±0.58  |
| Ag                              | ng m <sup>-3</sup>                         | 0.64±0.60           | 0.56±0.30 | 0.89±0.80 | 1.30±1.00 | 0.51±0.38 | 0.27±0.15 | 0.65±0.60 | 0.48±0.20 | 0.47±0.20  |
| Cd                              | ng m <sup>-3</sup>                         | 0.06±0.05           | 0.17±0.07 | 0.28±0.14 | 0.36±0.18 | 0.16±0.06 | 0.08±0.04 | 0.06±0.02 | 0.10±0.05 | 0.13±0.04  |
| Sn                              | ng m <sup>-3</sup>                         | 17.4±13.6           | 21.3±13.0 | 19.1±14.1 | 34.5±27.9 | 31.7±23.4 | 33.3±14.0 | 29.7±17.6 | 28.2±12.0 | 52.7±53.3  |
| Sb                              | ng m <sup>-3</sup>                         | 12.8±19.9           | 20.7±14.3 | 21.8±33.2 | 44.2±26.5 | 28.4±33.2 | 19.1±14.3 | 23.6±19.1 | 25.6±14.4 | 33.6±19.9  |
| Ba                              | ng m <sup>-3</sup>                         | 31.4±22.8           | 43.1±33.2 | 60.2±60.4 | 39.4±28.5 | 39.5±21.9 | 42.6±26.6 | 38.9±23.1 | 41.5±27.3 | 76.6±34.1  |
| Hg                              | ng m <sup>-3</sup>                         | 0.03±0.03           | 0.05±0.03 | 0.06±0.04 | 0.07±0.05 | 0.06±0.06 | 0.04±0.02 | 0.06±0.02 | 0.03±0.02 | 0.06±0.01  |
| Tl                              | ng m <sup>-3</sup>                         | 0.02±0.02           | 0.04±0.02 | 0.07±0.03 | 0.05±0.03 | 0.01±0.01 | 0.01±0.01 | 0.01±0.01 | 0.02±0.01 | 0.03±0.01  |
| Pb                              | ng m <sup>-3</sup>                         | 2.28±2.20           | 4.13±1.56 | 6.63±2.52 | 7.28±3.33 | 4.41±2.02 | 5.05±2.73 | 4.61±1.57 | 8.68±3.94 | 19.9±9.01  |
| DTT <sub>m</sub> <sup>DTT</sup> | pmol min <sup>-1</sup><br>ug <sup>-1</sup> | 22.2±22.0           | 83.9±80.9 | 27.6±21.9 | 20.7±9.86 | 21.8±13.2 | 24.2±20.0 | 18.9±14.3 | 10.8±7.16 | 9.28±4.81  |
| DTT <sub>v</sub> <sup>DTT</sup> | nmol min <sup>-1</sup><br>m <sup>-3</sup>  | 0.33±0.26           | 0.28±0.18 | 0.38±0.13 | 0.41±0.17 | 0.34±0.12 | 0.32±0.19 | 0.29±0.10 | 0.23±0.07 | 0.28±0.112 |
| PM                              | µg m <sup>-3</sup>                         | 8.57±7.27           | 18.9±10.1 | 23.2±12.8 | 20.5±12.1 | 16.3±7.77 | 20.4±9.16 | 43.5±41.2 | 31.9±7.54 | 74.9±16.5  |

**Table S5.** Relationships between enrichment factor (EF) and enrichment degree of the studied elements.

| Enrichment Factor (EF) |                      |       |                                       |
|------------------------|----------------------|-------|---------------------------------------|
| EF                     | Degree of enrichment | Level | Source                                |
| EF < 1                 | Almost no enrichment | 1     | Natural sources                       |
| 1 ≤ EF < 10            | Slight enrichment    | 2     | Natural sources and anthropic sources |
| 10 ≤ EF < 100          | Moderate enrichment  | 3     | Anthropic sources                     |
| 100 ≤ EF < 1000        | High enrichment      | 4     | Anthropic sources                     |
| 1000 ≤ EF              | Super enrichment     | 5     | Anthropic sources                     |

**Table S6.** Enrichment factor of elements in PM with different sizes in the waste recycle plant, South China.

| species | Enrichment Factor (EF) |                       |                      |
|---------|------------------------|-----------------------|----------------------|
|         | PM <sub>0.4</sub>      | PM <sub>0.4–2.1</sub> | PM <sub>2.1–10</sub> |
| Al      | 1                      | 1                     | 1                    |
| K       | 3.42 ± 3.13            | 3.38 ± 2.53           | 2.76 ± 1.46          |
| Ca      | 1.09 ± 0.81            | 0.97 ± 0.58           | 0.96 ± 0.10          |
| V       | 0.32 ± 0.36            | 0.62 ± 0.43           | 1.71 ± 1.44          |
| Cr      | 47.6 ± 46.4            | 17.3 ± 13.6           | 42.6 ± 78.8          |
| Mn      | 1.44 ± 1.06            | 5.49 ± 3.35           | 7.97 ± 7.59          |
| Fe      | 0.44 ± 0.42            | 0.88 ± 0.51           | 5.05 ± 6.09          |
| Co      | 1.62 ± 2.28            | 2.25 ± 2.80           | 5.21 ± 4.33          |
| Ni      | 5.29 ± 5.65            | 7.70 ± 5.16           | 17.8 ± 26.8          |
| Cu      | 1.82 ± 0.36            | 32.4 ± 22.6           | 85.7 ± 52.8          |
| Zn      | 179 ± 213              | 235 ± 194             | 125 ± 95.8           |
| As      | 186 ± 244              | 146 ± 207             | 146 ± 236            |
| Se      | 75.3 ± 84.9            | 111 ± 63              | 40.4 ± 54.0          |
| Ag      | 248 ± 214              | 538 ± 267             | 204 ± 123            |
| Cd      | 92.5 ± 92.3            | 502 ± 279             | 127 ± 81.3           |
| Sn      | 171 ± 102              | 255 ± 243             | 311 ± 265            |
| Sb      | 387 ± 233              | 352 ± 205             | 120 ± 948            |
| Ba      | 25.3 ± 27.5            | 31.0 ± 34.2           | 15.8 ± 5.45          |
| Hg      | 20.5 ± 3.86            | 77.0 ± 105            | 33.8 ± 25.2          |
| Tl      | 0.06 ± 0.05            | 6.30 ± 4.06           | 1.90 ± 1.08          |
| Pb      | 2.39 ± 1.65            | 15.3 ± 9.06           | 16.6 ± 16.9          |

**Table S7.** Comparison of  $OP_m^{DTT}$  ( $\text{pmol min}^{-1} \mu\text{g}^{-1}$ ) and  $OP_v^{DTT}$  ( $\text{nmol min}^{-1} \text{m}^{-3}$ ) in PM with different sizes around the world.

| Country     | Environment or source           | PM              | $OP_m^{DTT}$<br>( $\text{pmol min}^{-1} \mu\text{g}^{-1}$ ) | $DTT_v^{DTT}$<br>( $\text{nmol min}^{-1} \text{m}^{-3}$ ) | Ref. |
|-------------|---------------------------------|-----------------|-------------------------------------------------------------|-----------------------------------------------------------|------|
| USA         | Urban outdoor                   | $PM_{0.17}$     | 11.0–60.0                                                   | -                                                         | [6]  |
|             | Urban outdoor                   | $PM_{0.17-1}$   | 24.0–92.0                                                   | -                                                         | [6]  |
|             | Urban outdoor                   | $PM_1$          | 71.0±9.00                                                   | -                                                         | [6]  |
|             | Urban outdoor                   | $PM_{2.5}$      | 5.00–100                                                    | 0.10–1.50                                                 | [7]  |
|             | Urban outdoor                   | $PM_{3.2}$      | -                                                           | 0.06±0.06                                                 | [8]  |
|             | Urban outdoor                   | $PM_{3.2-18}$   | -                                                           | 0.05±0.03                                                 | [8]  |
|             | Roadside                        | $PM_{3.2}$      | -                                                           | 0.03±0.01                                                 | [8]  |
|             | Roadside                        | $PM_{3.2-18}$   | -                                                           | 0.17±0.14                                                 | [8]  |
|             | Biomass burning                 | $PM_{2.5}$      | 69.0±20.0                                                   | -                                                         | [9]  |
|             | Biomass burning organic aerosol | $PM_{2.5}$      | 151±20.0                                                    | -                                                         | [10] |
|             | More-oxidized organic aerosol   | $PM_{2.5}$      | 36.0±22.0                                                   | -                                                         | [10] |
|             | Light-duty gasoline vehicles    | $PM_{2.5}$      | 110±22.0                                                    | -                                                         | [9]  |
|             | Heavy-duty diesel vehicles      | $PM_{2.5}$      | 52.0±10.0                                                   | -                                                         | [9]  |
| India       | Trash combustion                | $PM_{2.5}$      | -                                                           | 100–3500                                                  | [11] |
| Italy       | Urban outdoor                   | $PM_{10}$       | 8.00±2.00                                                   | 0.17±0.05                                                 | [12] |
|             | A traffic site                  | TSP             | 330±180                                                     | 40.0±30.0                                                 | [13] |
| Singapore   | Tunnel                          | $PM_{2.5}$      | 9.30 ± 5.40                                                 | 0.80 ± 0.40                                               | [14] |
|             | Depot                           | $PM_{2.5}$      | 11.0± 10.0                                                  | 0.80 ± 0.70                                               | [14] |
| Netherlands | Urban background                | $PM_{10}$       | -                                                           | 1.70                                                      | [15] |
|             | Farm                            | $PM_{10}$       | -                                                           | 2.30                                                      | [15] |
|             | Stop&Go traffic                 | $PM_{10}$       | -                                                           | 2.60                                                      | [15] |
|             | Continuous traffic              | $PM_{10}$       | -                                                           | 3.70                                                      | [15] |
|             | Underground                     | $PM_{10}$       | -                                                           | 51.5                                                      | [15] |
|             | Farm                            | $PM_{2.5}$      | -                                                           | 2.70                                                      | [15] |
|             | Stop&Go traffic                 | $PM_{2.5}$      | -                                                           | 1.70                                                      | [15] |
|             | Continuous traffic              | $PM_{2.5}$      | -                                                           | 3.30                                                      | [15] |
|             | Underground                     | $PM_{2.5}$      | -                                                           | 18.0                                                      | [15] |
|             | Rural indoor                    | $PM_{2.5}$      | 88.9                                                        | 9.70                                                      | [16] |
| China       | Urban outdoor                   | $PM_{2.5}$      | 10.3                                                        | 0.53                                                      | [17] |
|             | Urban outdoor                   | $PM_{2.5}$      | 49.0±16.0                                                   | 6.80 ± 3.40                                               | [18] |
|             | Urban outdoor                   | $PM_{2.5}$      | 35.0±18.0                                                   | 4.4 0± 2.60                                               | [18] |
|             | Urban outdoor                   | $PM_{2.5}$      | 30.0±16.0                                                   | 4.20 ± 2.70                                               | [18] |
|             | Urban outdoor                   | $PM_{2.5}$      | 130±100                                                     | 12.3 ± 6.82                                               | [19] |
|             | Urban outdoor                   | $PM_{0.056-18}$ | -                                                           | 0.19                                                      | [20] |
|             | Residential indoor              | dust            | 7.14 ± 6.68                                                 |                                                           | [21] |
|             | Office                          | $PM_{18}$       | -                                                           | 0.15                                                      | [22] |
|             | Laboratory                      | $PM_{18}$       | -                                                           | 0.15                                                      | [22] |
|             | Home                            | $PM_{18}$       | -                                                           | 0.14                                                      | [22] |
|             | Cigarette                       | $PM_{10}$       | 60.0±4.00                                                   | -                                                         | [23] |
|             | Coal burning                    | $PM_{10}$       | 40.0±3.00                                                   | -                                                         | [23] |
|             | Diesel                          | $PM_{10}$       | 130±4.00                                                    | -                                                         | [23] |
|             | Biomass burning                 | $PM_{2.5}$      | 12.5–20.6                                                   | -                                                         | [23] |
| This study  | Indoor                          | $PM_{10}$       | 12.6±4.54                                                   | 2.83±0.50                                                 |      |

Mean ± standard deviation.

**Table S8.** Deposition fluxes of OP<sup>DTT</sup> (nmol min<sup>−1</sup> h<sup>−1</sup>) and elements (ng h<sup>−1</sup>) in PM with different sizes in the whole respiratory tract and health risks of elements in different positions of respiratory tract.

|    |                   | Deposition flux | Non-carcinogenic risks (HQ) |                         |                         |                         | Carcinogenic risks (CR) |                         |                         |                               |
|----|-------------------|-----------------|-----------------------------|-------------------------|-------------------------|-------------------------|-------------------------|-------------------------|-------------------------|-------------------------------|
|    |                   |                 | PM <sub>0.4</sub>           | PM <sub>0.4-2.1</sub>   | PM <sub>2.1-10</sub>    | SUM                     | PM <sub>0.4</sub>       | PM <sub>0.4-2.1</sub>   | PM <sub>2.1-10</sub>    | SUM                           |
| HA | V                 | 3.69±0.92       | 9.30 × 10 <sup>−8</sup>     | 4.39 × 10 <sup>−6</sup> | 8.20 × 10 <sup>−5</sup> | 8.65 × 10 <sup>−5</sup> | -                       | -                       | -                       | -                             |
|    | Cr <sup>a</sup>   | 63.9±36.5       | 2.17 × 10 <sup>−4</sup>     | 5.13 × 10 <sup>−3</sup> | 4.22 × 10 <sup>−2</sup> | 4.76 × 10 <sup>−2</sup> | 1.83 × 10 <sup>−5</sup> | 4.33 × 10 <sup>−4</sup> | 3.57 × 10 <sup>−3</sup> | <b>4.02 × 10<sup>−3</sup></b> |
|    | Mn                | 71.5±16.4       | 2.51 × 10 <sup>−4</sup>     | 7.70 × 10 <sup>−2</sup> | 7.43 × 10 <sup>−1</sup> | 8.20 × 10 <sup>−1</sup> | -                       | -                       | -                       | -                             |
|    | Fe                | 4890±1220       | 3.76 × 10 <sup>−7</sup>     | 3.43 × 10 <sup>−5</sup> | 1.11 × 10 <sup>−3</sup> | 1.15 × 10 <sup>−3</sup> | -                       | -                       | -                       | -                             |
|    | Co                | 1.60±0.51       | 4.15 × 10 <sup>−5</sup>     | 3.73 × 10 <sup>−3</sup> | 4.22 × 10 <sup>−2</sup> | 4.60 × 10 <sup>−2</sup> | 1.63 × 10 <sup>−7</sup> | 1.47 × 10 <sup>−5</sup> | 1.66 × 10 <sup>−4</sup> | <b>1.81 × 10<sup>−4</sup></b> |
|    | Cu                | 40.6±23.2       | 4.83 × 10 <sup>−8</sup>     | 1.27 × 10 <sup>−5</sup> | 1.53 × 10 <sup>−4</sup> | 1.66 × 10 <sup>−4</sup> | -                       | -                       | -                       | -                             |
|    | Zn                | 305±115         | 5.78 × 10 <sup>−7</sup>     | 2.41 × 10 <sup>−5</sup> | 1.42 × 10 <sup>−4</sup> | 1.67 × 10 <sup>−4</sup> | -                       | -                       | -                       | -                             |
|    | As                | 29.2±9.01       | 4.40 × 10 <sup>−6</sup>     | 2.19 × 10 <sup>−3</sup> | 1.37 × 10 <sup>−2</sup> | 1.59 × 10 <sup>−2</sup> | 1.41 × 10 <sup>−6</sup> | 6.98 × 10 <sup>−4</sup> | 4.38 × 10 <sup>−3</sup> | <b>5.08 × 10<sup>−3</sup></b> |
|    | Cd                | 0.44±0.13       | 1.05 × 10 <sup>−7</sup>     | 2.66 × 10 <sup>−5</sup> | 4.59 × 10 <sup>−5</sup> | 7.26 × 10 <sup>−5</sup> | 4.64 × 10 <sup>−8</sup> | 1.18 × 10 <sup>−5</sup> | 2.03 × 10 <sup>−5</sup> | 3.21 × 10 <sup>−5</sup>       |
|    | Pb                | 27.1±9.22       | 8.31 × 10 <sup>−7</sup>     | 1.67 × 10 <sup>−4</sup> | 1.10 × 10 <sup>−3</sup> | 1.26 × 10 <sup>−3</sup> | 5.76 × 10 <sup>−8</sup> | 1.16 × 10 <sup>−5</sup> | 7.59 × 10 <sup>−5</sup> | 8.75 × 10 <sup>−5</sup>       |
|    | Tl                | 0.07±0.02       | 2.15 × 10 <sup>−7</sup>     | 4.66 × 10 <sup>−4</sup> | 6.96 × 10 <sup>−4</sup> | 1.16 × 10 <sup>−3</sup> | -                       | -                       | -                       | -                             |
|    | OP <sup>DTT</sup> | 0.98±0.29       | 0.00±0.00 <sup>b</sup>      | 0.21±0.06 <sup>b</sup>  | 0.77±0.14 <sup>b</sup>  | -                       | -                       | -                       | -                       | -                             |
| TB | V                 | 0.15±0.03       | 3.07 × 10 <sup>−8</sup>     | 4.18 × 10 <sup>−7</sup> | 2.96 × 10 <sup>−6</sup> | 3.41 × 10 <sup>−6</sup> | -                       | -                       | -                       | -                             |
|    | Cr <sup>a</sup>   | 3.33±2.30       | 7.17 × 10 <sup>−5</sup>     | 4.74 × 10 <sup>−4</sup> | 1.94 × 10 <sup>−3</sup> | 2.48 × 10 <sup>−3</sup> | 6.06 × 10 <sup>−6</sup> | 4.00 × 10 <sup>−5</sup> | 1.64 × 10 <sup>−4</sup> | <b>2.10 × 10<sup>−4</sup></b> |
|    | Mn                | 2.84±0.57       | 8.28 × 10 <sup>−5</sup>     | 7.28 × 10 <sup>−3</sup> | 2.52 × 10 <sup>−2</sup> | 3.26 × 10 <sup>−2</sup> | -                       | -                       | -                       | -                             |
|    | Fe                | 171±41.7        | 1.24 × 10 <sup>−7</sup>     | 3.28 × 10 <sup>−6</sup> | 3.66 × 10 <sup>−5</sup> | 4.00 × 10 <sup>−5</sup> | -                       | -                       | -                       | -                             |
|    | Co                | 0.07±0.03       | 1.37 × 10 <sup>−5</sup>     | 3.50 × 10 <sup>−4</sup> | 1.68 × 10 <sup>−3</sup> | 2.05 × 10 <sup>−3</sup> | 5.39 × 10 <sup>−8</sup> | 1.38 × 10 <sup>−6</sup> | 6.62 × 10 <sup>−6</sup> | 8.05 × 10 <sup>−6</sup>       |
|    | Cu                | 1.55±0.84       | 1.59 × 10 <sup>−8</sup>     | 1.20 × 10 <sup>−6</sup> | 5.12 × 10 <sup>−6</sup> | 6.34 × 10 <sup>−6</sup> | -                       | -                       | -                       | -                             |
|    | Zn                | 15.9±7.61       | 1.91 × 10 <sup>−7</sup>     | 2.26 × 10 <sup>−6</sup> | 6.22 × 10 <sup>−6</sup> | 8.68 × 10 <sup>−6</sup> | -                       | -                       | -                       | -                             |
|    | As                | 1.41±0.05       | 1.45 × 10 <sup>−6</sup>     | 2.11 × 10 <sup>−4</sup> | 5.55 × 10 <sup>−4</sup> | 7.67 × 10 <sup>−4</sup> | 4.64 × 10 <sup>−7</sup> | 6.75 × 10 <sup>−5</sup> | 1.77 × 10 <sup>−4</sup> | <b>2.45 × 10<sup>−4</sup></b> |
|    | Cd                | 0.03±0.01       | 3.46 × 10 <sup>−8</sup>     | 2.54 × 10 <sup>−6</sup> | 2.28 × 10 <sup>−6</sup> | 4.85 × 10 <sup>−6</sup> | 1.53 × 10 <sup>−8</sup> | 1.12 × 10 <sup>−6</sup> | 1.01 × 10 <sup>−6</sup> | 2.15 × 10 <sup>−6</sup>       |
|    | Pb                | 1.21±0.40       | 2.74 × 10 <sup>−7</sup>     | 1.58 × 10 <sup>−5</sup> | 4.02 × 10 <sup>−5</sup> | 5.63 × 10 <sup>−5</sup> | 1.90 × 10 <sup>−8</sup> | 1.10 × 10 <sup>−6</sup> | 2.78 × 10 <sup>−6</sup> | 3.90 × 10 <sup>−6</sup>       |
|    | Tl                | 0.00±0.00       | 7.10 × 10 <sup>−8</sup>     | 4.38 × 10 <sup>−5</sup> | 2.95 × 10 <sup>−5</sup> | 7.33 × 10 <sup>−5</sup> | -                       | -                       | -                       | -                             |
|    | OP <sup>DTT</sup> | 0.06±0.01       | 0.00±0.00 <sup>b</sup>      | 0.02±0.01 <sup>b</sup>  | 0.04±0.01 <sup>b</sup>  | -                       | -                       | -                       | -                       | -                             |
| PA | V                 | 0.25±0.05       | 2.24 × 10 <sup>−7</sup>     | 1.53 × 10 <sup>−6</sup> | 4.00 × 10 <sup>−6</sup> | 5.76 × 10 <sup>−6</sup> | -                       | -                       | -                       | -                             |
|    | Cr <sup>a</sup>   | 7.19±5.61       | 5.23 × 10 <sup>−4</sup>     | 2.11 × 10 <sup>−3</sup> | 2.72 × 10 <sup>−3</sup> | 5.36 × 10 <sup>−3</sup> | 4.42 × 10 <sup>−5</sup> | 1.78 × 10 <sup>−4</sup> | 2.30 × 10 <sup>−4</sup> | <b>4.52 × 10<sup>−4</sup></b> |
|    | Mn                | 5.52±1.26       | 6.04 × 10 <sup>−4</sup>     | 2.88 × 10 <sup>−2</sup> | 3.38 × 10 <sup>−2</sup> | 6.32 × 10 <sup>−2</sup> | -                       | -                       | -                       | -                             |
|    | Fe                | 262±64.8        | 9.06 × 10 <sup>−7</sup>     | 1.18 × 10 <sup>−5</sup> | 4.87 × 10 <sup>−5</sup> | 6.13 × 10 <sup>−5</sup> | -                       | -                       | -                       | -                             |
|    | Co                | 0.13±0.06       | 9.99 × 10 <sup>−5</sup>     | 1.40 × 10 <sup>−3</sup> | 2.35 × 10 <sup>−3</sup> | 3.86 × 10 <sup>−3</sup> | 3.93 × 10 <sup>−7</sup> | 5.52 × 10 <sup>−6</sup> | 9.25 × 10 <sup>−6</sup> | 1.52 × 10 <sup>−5</sup>       |
|    | Cu                | 2.86±1.57       | 1.16 × 10 <sup>−7</sup>     | 4.66 × 10 <sup>−6</sup> | 6.89 × 10 <sup>−6</sup> | 1.17 × 10 <sup>−5</sup> | -                       | -                       | -                       | -                             |
|    | Zn                | 35.4±18.1       | 1.39 × 10 <sup>−6</sup>     | 9.33 × 10 <sup>−6</sup> | 8.64 × 10 <sup>−6</sup> | 1.94 × 10 <sup>−5</sup> | -                       | -                       | -                       | -                             |
|    | As                | 2.69±0.98       | 1.06 × 10 <sup>−5</sup>     | 6.88 × 10 <sup>−4</sup> | 7.68 × 10 <sup>−4</sup> | 1.47 × 10 <sup>−3</sup> | 3.38 × 10 <sup>−6</sup> | 2.20 × 10 <sup>−4</sup> | 2.45 × 10 <sup>−4</sup> | <b>4.69 × 10<sup>−4</sup></b> |
|    | Cd                | 0.08±0.03       | 2.52 × 10 <sup>−7</sup>     | 9.43 × 10 <sup>−6</sup> | 3.33 × 10 <sup>−6</sup> | 1.30 × 10 <sup>−5</sup> | 1.12 × 10 <sup>−7</sup> | 4.18 × 10 <sup>−6</sup> | 1.47 × 10 <sup>−6</sup> | 5.76 × 10 <sup>−6</sup>       |
|    | Pb                | 2.53±0.78       | 2.00 × 10 <sup>−6</sup>     | 6.09 × 10 <sup>−5</sup> | 5.47 × 10 <sup>−5</sup> | 1.18 × 10 <sup>−4</sup> | 1.39 × 10 <sup>−7</sup> | 4.22 × 10 <sup>−6</sup> | 3.79 × 10 <sup>−6</sup> | 8.15 × 10 <sup>−6</sup>       |
|    | Tl                | 0.01±0.01       | 5.18 × 10 <sup>−7</sup>     | 1.82 × 10 <sup>−4</sup> | 4.16 × 10 <sup>−5</sup> | 2.24 × 10 <sup>−4</sup> | -                       | -                       | -                       | -                             |
|    | OP <sup>DTT</sup> | 0.15±0.05       | 0.01±0.01 <sup>b</sup>      | 0.08±0.02 <sup>b</sup>  | 0.06±0.01 <sup>b</sup>  | -                       | -                       | -                       | -                       | -                             |

<sup>a</sup>: The health risk of Cr is mainly for Cr (VI); the concentrations of Cr (VI) were estimated based on a concentration ratio of Cr (VI) to total Cr of 0.13. <sup>b</sup>: The deposition fluxes of OP<sup>DTT</sup> of PM with different sizes.

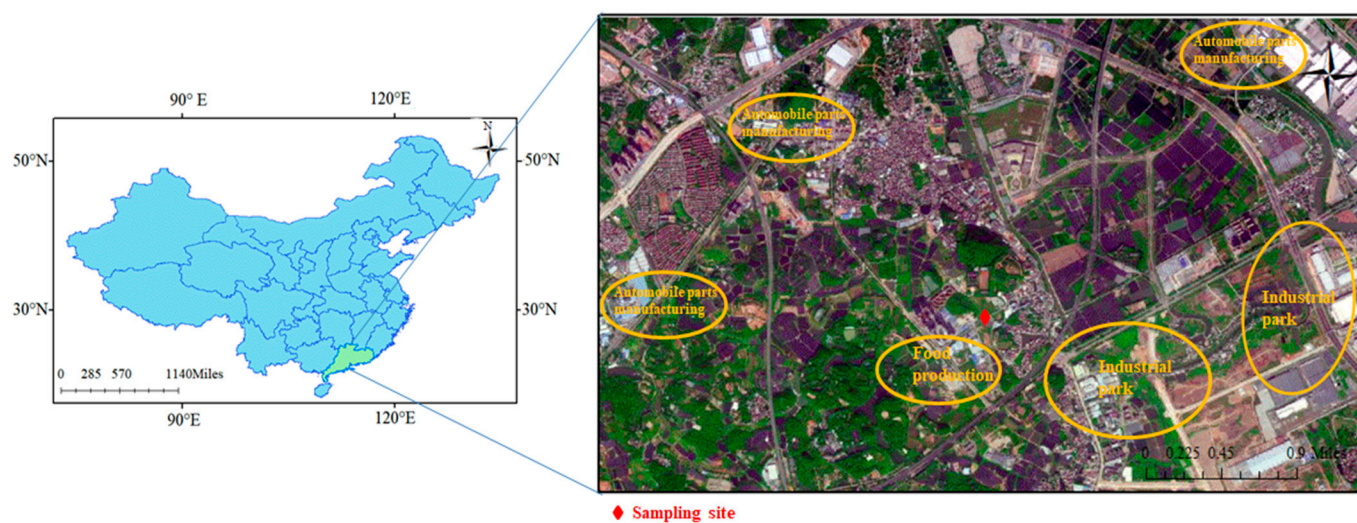

**Figure S1.** Sampling site and surrounding environment of the plant.

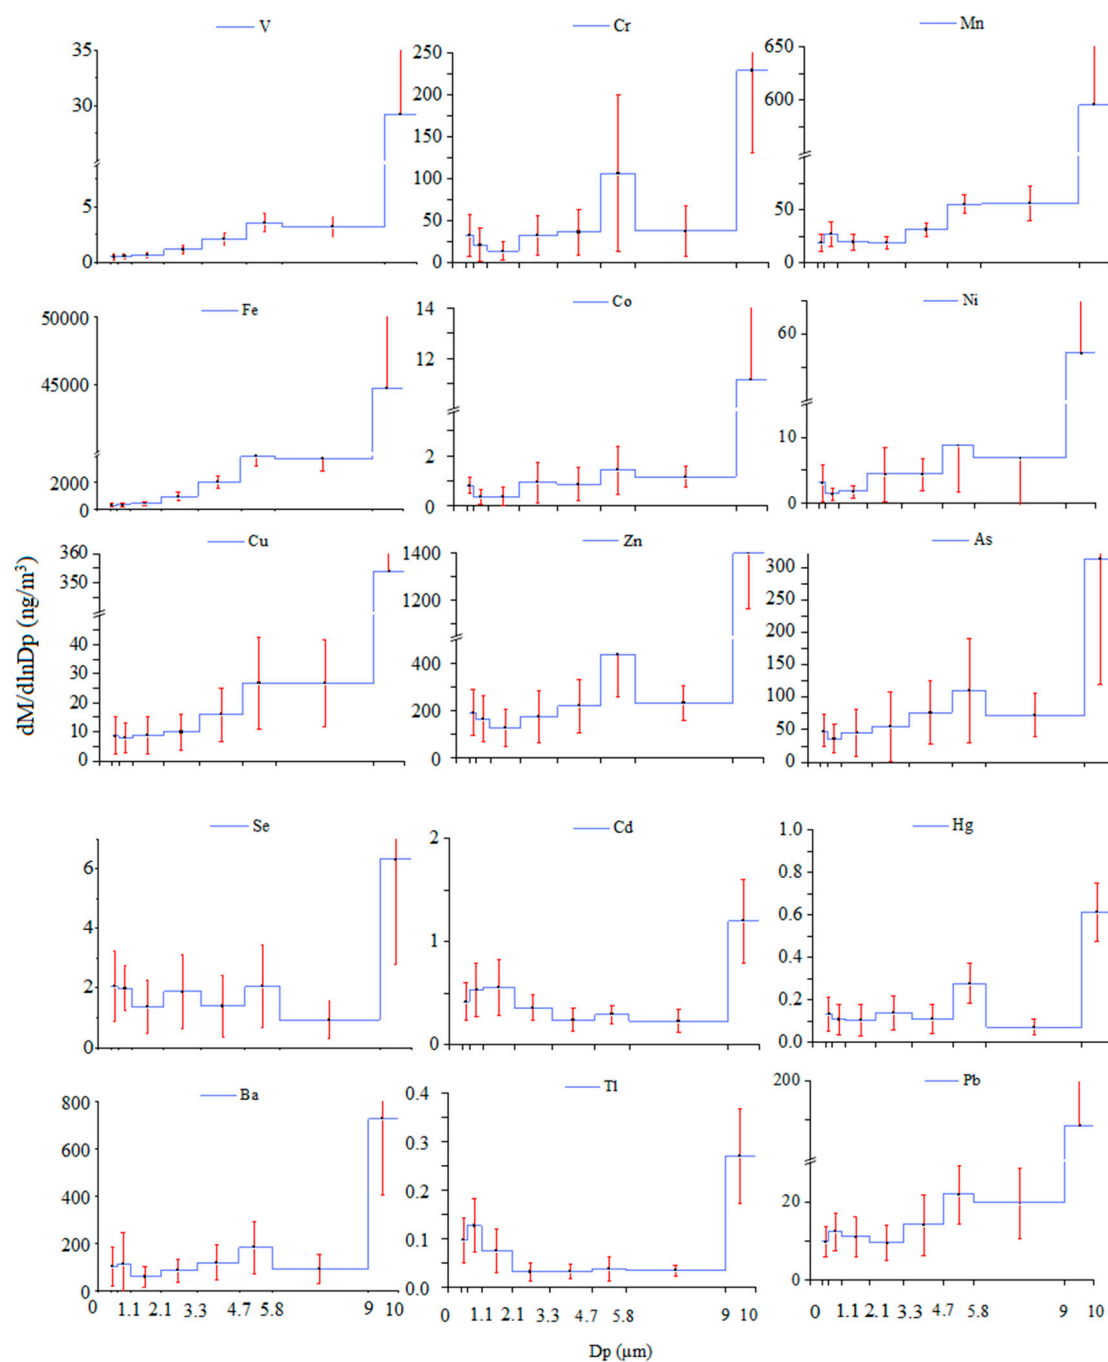

**Figure S2.** Size distribution of mean concentration of PM-bound elements (ng m<sup>-3</sup>) in the waste recycling plant, South China. (Error bars in red refer to the standard deviations (n = 12); Dp is the particle diameter (μm).)



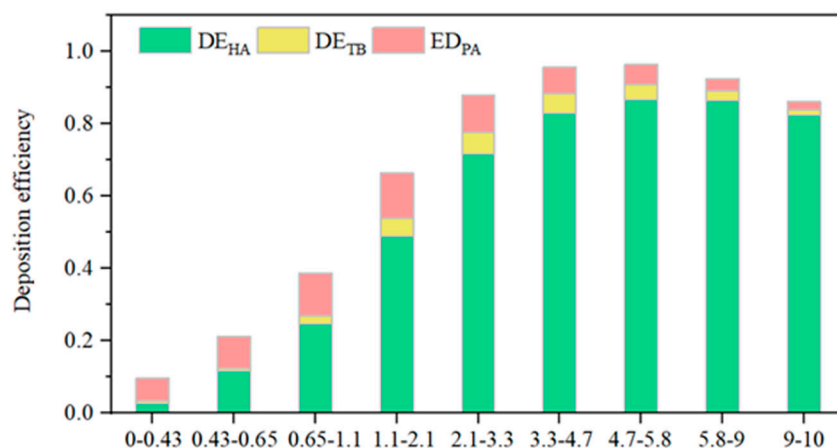

**Figure S3.** Deposition efficiency of size-resolved PM in head (HA), tracheobronchial (TB), and pulmonary (PA) regions using ICRP model.

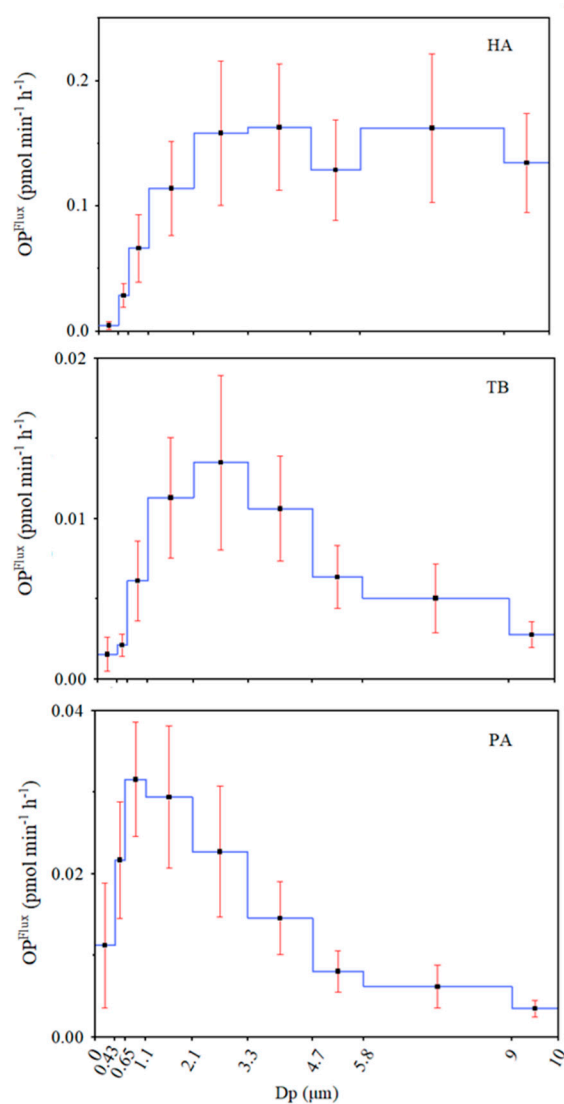

**Figure S4.** Mean deposition flux of OP<sup>DTT</sup> (OP<sup>Flux</sup>) in different size-fractionated stages in head (HA), tracheobronchial (TB), and pulmonary (PA) regions using ICRP model. (Error bars in red refer to the standard deviations (n = 12); Dp is the particle diameter (μm).)

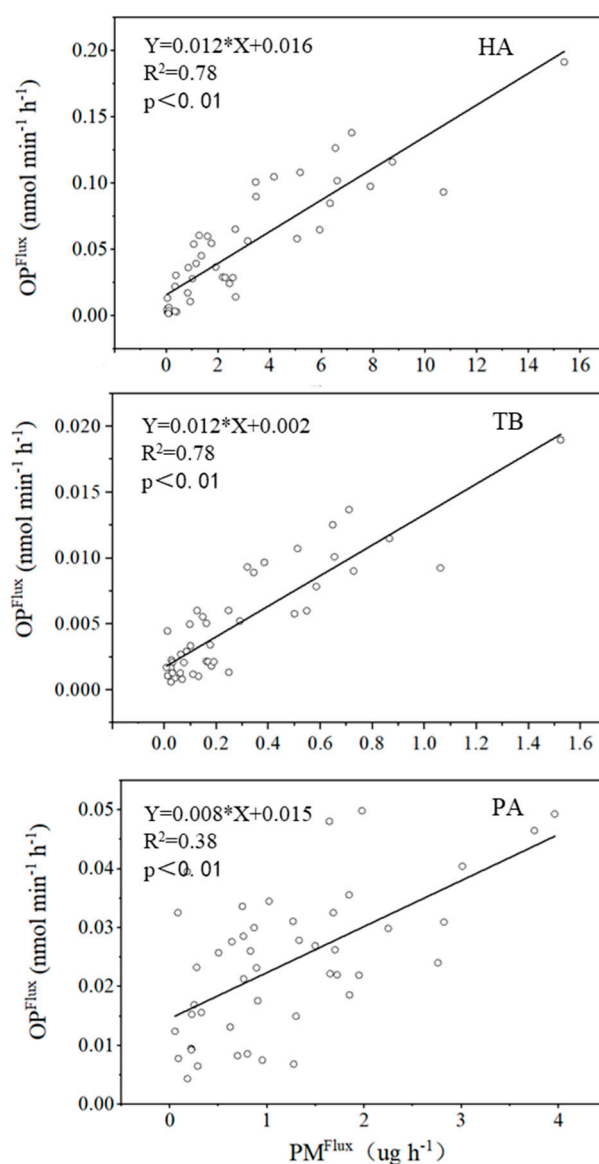

**Figure S5.** Univariate linear regression analysis between deposition flux of OP<sup>DTT</sup> (OP<sup>Flux</sup>: dependent variable) and mass concentration of PM<sub>2.1</sub> (PM<sub>2.1</sub><sup>Flux</sup>: independent variable) in head (HA), tracheobronchial (TB), and pulmonary (PA) regions using ICRP model.

## Reference

1. Wei, F.S.; Chen, J.S.; Wu, Y.Y.; Zheng, C.J. *Introduction to Background Value of Soil Environment*; China Environmental Science Press: Beijing, China; China Ministry of Environmental Protection: Beijing, China, 1990.
2. USEPA. Risk assessment guidance for Superfund: Volume III — part A, Process for Conducting Probabilistic Risk Assessment; United States Environmental Protection Agency: Washington, DC, USA, 2001. Available online at: <https://semspub.epa.gov/work/HQ/134487.pdf> (accessed at 29 February 2024).
3. USEPA. Risk Assessment Guidance for Superfund: Volume I — Human Health Evaluation Manual — part E, Supplemental Guidance for Dermal Risk Assessment; United States Environmental Protection Agency: Washington, DC, USA, 2004. Available online at: <https://www.epa.gov/risk/risk-assessment-guidance-superfund-rags-part-e> (accessed at 29 February 2024).
4. USEPA. Exposure Factors Handbook, 2011th ed.; National Center for Environmental Assessment: Washington, DC, USA, 2011.
5. USEPA. Risk Assessment Guidance for Superfund. Volume I: Human Health Evaluation Manual (Part A); United States Environmental Protection Agency: Washington, DC, USA, 1989.
6. Charrier, J.G.; Richards-Henderson, N.K.; Bein, K.J.; McFall, A.S.; Wexler, A.S.; Anastasio, C. Oxidant production from source-oriented particulate matter—Part 1: Oxidative potential using the dithiothreitol (DTT) assay. *Atmos. Chem. Phys.* **2015**, *15*, 2327–2340.

7. Verma, V.; Fang, T.; Guo, H.; King, L.; Bates, J. T.; Peltier, R. E.; Edgerton, E.; Russell, A. G.; Weber, R. J. Reactive oxygen species associated with water-soluble PM<sub>2.5</sub> in the southeastern United States: spatiotemporal trends and source apportionment. *Atmospheric Chemistry and Physics* **2014**, *14* (13), 19625–19672.
8. Fang, T.; Zeng, L.H.; Gao, D.; Verma, V.; Stefaniak, A.B.; Weber, R.J. Ambient size distributions and lung deposition of aerosol dithiothreitol-measured oxidative potential: Contrast between soluble and insoluble particles. *Environ. Sci. Technol.* **2017**, *51*, 6802–6811.
9. Bates, J.T.; Weber, R.J.; Abrams, J.; Verma, V.; Fang, T.; Klein, M.; Strickland, M.J.; Sarnat, S.E.; Chang, H.H.; et al. Reactive oxygen species generation linked to sources of atmospheric particulate matter and cardiorespiratory effects. *Environ. Sci. Technol.* **2016**, *49*, 13605–13612.
10. Verma, V.; Fang, T.; Xu, L.; Peltier, R.E.; Russell, A.G.; Ng, N.L.; Weber, R.J. Organic aerosols associated with the generation of reactive oxygen species (ROS) by water-soluble PM<sub>2.5</sub>. *Environ. Sci. Technol.* **2015**, *49*, 4646–4656.
11. Vreeland, H.; Schauer, J. J.; Russell, A. G.; Marshall, J. D.; Fushimi, A.; Jain, G.; Sethuraman, K.; Verma, V.; Tripathi, S. N.; Bergin, M. H. Chemical characterization and toxicity of particulate matter emissions from roadside trash combustion in urban India. *Atmos. Environ.* **2016**, *147*, 22–30.
12. Romano, S.; Becagli, S.; Lucarelli, F.; Russo, M.; Pietrogrande, M. C. Oxidative Potential Sensitivity to Metals, Br, P, S, and Se in PM<sub>10</sub> Samples: New Insights from a Monitoring Campaign in Southeastern Italy. *Atmosphere* **2020**, *11* (4), 367.
13. Perrone, M.G.; Zhou, J.; Dommen, J.; Malandrino, M.; Sangiorgi, G.; Rizzi, C.; Ferrero, L.; Dommen, J.; Bolzacchini, E. PM chemical composition and oxidative potential of the soluble fraction of particles at two sites in the urban area of Milan, Northern Italy. *Atmospheric Environment* **2016**, *128*, 104–113.
14. Sauvain, J.J.; Deslarzes, S.; Storti, F.; Riediker, M. Oxidative Potential of Particles in Different Occupational Environments: A Pilot Study. *Annals of Occupational Hygiene* **2015**, *59* (7), 882–894.
15. Janssen, N.A.H.; Yang, A.L.; Strak, M.; Steenhof, M.; Hellack, B.; Gerlofs-Nijland, M.E.; Kuhlbusch, T.; Kelly, F.; Harrison, R.M.; Brunekreef, B.; et al. Oxidative potential of particulate matter collected at sites with different source characteristics. *Sci. Total Environ.* **2014**, *472*, 572–581.
16. Brehmer, C.; Lai, A. M.; Clark, S.; Shan, M.; Carter, E. M. The Oxidative Potential of Personal and Household PM<sub>2.5</sub> in a Rural Setting in Southwestern China. *Environmental Science and Technology* **2019**, *53* (5), 2788–2798.
17. Wang, Y.; Wang, M.; Li, S.; Sun, H.; Mu, Z.; Zhang, L.; Li, Y.; Chen, Q. Study on the oxidation potential of the water-soluble components of ambient PM<sub>2.5</sub> over Xi'an, China: Pollution levels, source apportionment and transport pathways. *Environ Internat.* **2020**, *136*, 105515.
18. Liu, W.; Xu, Y.S.; Liu, W.X.; Liu, Q.Y.; Yu, S.Y.; Liu, Y.; Wang, X.; Tao, S. Oxidative potential of ambient PM<sub>2.5</sub> in the coastal cities of the Bohai Sea, northern China: Seasonal variation and source apportionment. *Environ. Pollut.* **2018**, *236*, 514–528.
19. Yu, S.Y.; Liu, W.J.; Xu, Y.S.; Yi, K.; Zhou, M.; Tao, S.; Liu, W.X. Characteristics and oxidative potential of atmospheric PM<sub>2.5</sub> in Beijing: Source apportionment and seasonal variation. *Sci. Total Environ.* **2019**, *650*, 277–287.
20. Lyu, Y.; Guo, H.B.; Cheng, T.T.; Li, X. Particle size distributions of oxidative potential of lung-deposited particles: Assessing contributions from quinones and water-soluble metals. *Environ. Sci. Technol.* **2018**, *52*, 6592–6600.
21. Zhang, Y.J.; Cong, H.; Lv, Y. S.; Ma, S. X.; Ying, G.; Zeng, E. Y. Polycyclic aromatic hydrocarbon exposure, oxidative potential in dust, and their relationships to oxidative stress in human body: A case study in the indoor environment of Guangzhou, South China. *Environ Internat.* **2021**, *149*, 106405.
22. Guo, H.B.; Li, M.; Lyu, Y.; Cheng, T.T.; Xu, J.J.; Li, X. Size-resolved particle oxidative potential in the office, laboratory, and home: Evidence for the importance of water-soluble transition metals. *Environ. Pollut.* **2019**, *246*, 704–709.
23. Jin, W.; Su, S.; Wang, B.; Zhu, X.; Chen, Y.; Shen, G.; Liu, J.; Cheng, H.; Wang, X.; Wu, S. Properties and cellular effects of particulate matter from direct emissions and ambient sources. *J Environ Sci Health A Tox Hazard Subst Environ Eng.* **2016**, *51* (11–12), 1075–1083.
